# Supplementary material
Source: publisher figshare collection journal article supplement (https://acs.figshare.com/ndownloader/files/9514819)
Supplement: Supplementary file 1 [file 9514819]

## Supporting information:

### High-resolution *in situ* measurement of nitrate in runoff from the Greenland Ice Sheet

Authors: Alexander D. Beaton<sup>1</sup>, Jemma L. Wadham<sup>2</sup>, Jon Hawkings<sup>2</sup>, Elizabeth A. Bagshaw<sup>3</sup>,  
Guillaume Lamarche-Gagnon<sup>2</sup>, Matthew C. Mowlem<sup>1</sup>, Martyn Tranter<sup>2</sup>

1. National Oceanography Centre, European Way, Southampton, SO14 3ZH
2. Bristol Glaciology Centre, University of Bristol, University Road, Bristol, BS8 1SS
3. School of Ocean and Earth Sciences, Cardiff University, Cardiff, CF10 3AT

\*Corresponding author: [a.beaton@noc.ac.uk](mailto:a.beaton@noc.ac.uk), Tel: +442380596268

#### Summary of content:

**Total pages:** 3 (1 Table, 2 Figures)

1. Data from analysis of supraglacial meltwater samples at KS
2. Details on discharge measurements at KS and LG
3. LOD and calibration
4. Relationship between the LOC sensor measurements at Leverett glacier and the analysis of the manually collected samples

#### 1. Data from analysis of supraglacial meltwater samples at KS

| Location                   | Date               | Nitrate (ppb) | Nitrate (μM) |
|----------------------------|--------------------|---------------|--------------|
| Surpraglacial stream at KS | 27 June 2017       | 10.28         | 0.17         |
| Surpraglacial stream at KS | 27 June 2017       | 5.21          | 0.08         |
| Surpraglacial stream at KS | 27 June 2017       | 5.78          | 0.09         |
| Surpraglacial stream at KS | 27 June 2017       | 4.65          | 0.08         |
| Surpraglacial stream at KS | 27 June 2017       | 1.83          | 0.03         |
| Surpraglacial stream at KS | 27 June 2017       | 1.83          | 0.03         |
|                            | Mean               | 4.93          | 0.08         |
|                            | Standard deviation | 3.12          | 0.05         |

Table S1: Data from analysis of supraglacial meltwater samples collected from streams close to the margin at KS.

#### 2. Details on discharge measurements at KS and LG

Both discharge records used in this study have been published through previous studies at KS<sup>1</sup> and LG<sup>2</sup>, using previously published methods<sup>3</sup>. At both sites discharge was calculated based on rating

curves established using dye-dilution experiments and coinciding river-level measurements. River level was measured every ten minutes using two HOBO® Onset water level loggers and Druck wired pressure transducers located at stable bedrock sections in the rivers. The rating curve at KS was based on 51 Rhodamine-WT dye traces conducted between 1<sup>st</sup> May and 5<sup>th</sup> August 2013. River level ranged between 28 and 91 cm, covering a discharge range of 2.4 to 57.4 m<sup>3</sup>s<sup>-1</sup>. The rating curve at LG was based on 21 Rhodamine-WT dye traces, with the stage record ranging from 8 to 242 cm. Error in discharge measurements was estimated to +/-12.1 %.

### 3. LOD and calibration

Limit of detection (LOD) for the LOC nitrate sensor was estimated previously<sup>4</sup> by taking three times the standard deviation of ten subsequent blank-corrected absorption measurements of a 0.05 µM nitrite standard, and resulted in an LOD of 0.025 µM for nitrate.

Sensor accuracy was maintained throughout both deployments by running a blank (ultrapure water) and standard (3 µM nitrate in ultrapure water poisoned with 0.1% chloroform) for every glacial meltwater sample measurement. The measurement sequence was as follows:

**At KS:** 1. Blank 2. Sample 3. Standard

**At LG:** 1. Blank 2. Sample 3. Standard 4. ~40 minute wait

The wait period at LG meant that the analyser conducted 1 measurement per hour (rather than one every 20 minutes at KS).

### 4. Relationship between the LOC sensor measurements at Leverett glacier and the analysis of the manually collected samples

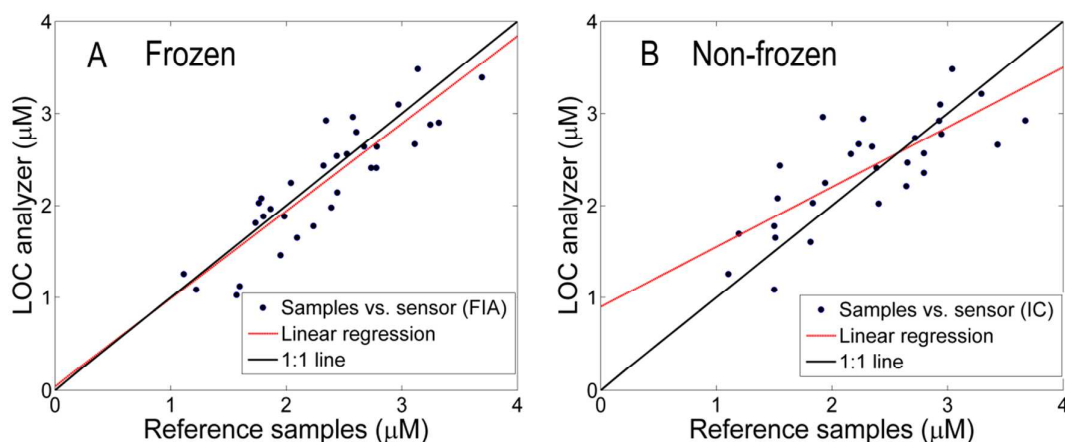

Figure S1: Relationship between the LOC sensor measurements at Leverett glacier and the analysis of the manually collected samples, comparing the frozen samples analysed using colourimetry and the non-frozen samples analysed using ion chromatography.

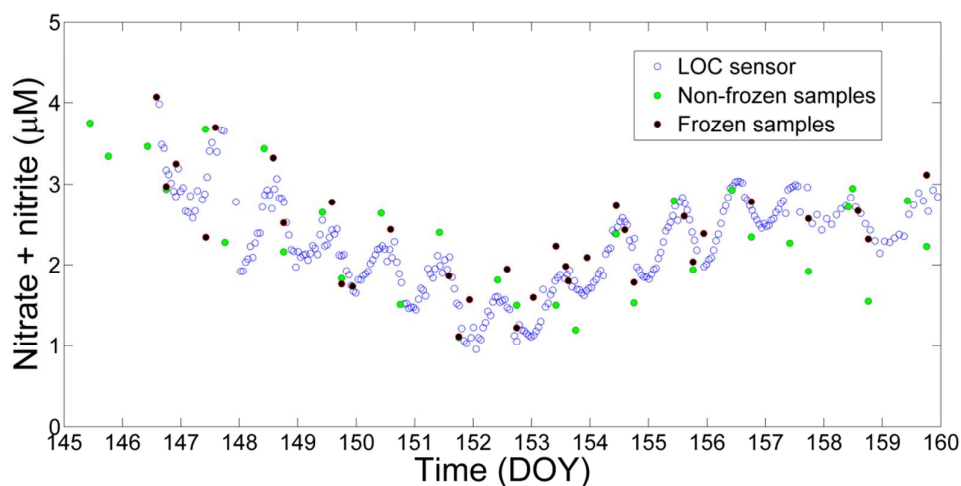

Figure S2: Time series showing both sets of reference samples plotted with the time series from the LOC analyser.

## **References**

- (1) Dubnick, A.; Kazemi, S.; Sharp, M.; Wadham, J.; Hawkings, J.; Beaton, A.; Lanoil, B. Hydrological controls on glacially exported microbial assemblages. *J. Geophys. Res. Biogeosciences* **2017**, *122* (5), 1049–1061 DOI: 10.1002/2016JG003685.
- (2) Kohler, T. J.; Žárský, J. D.; Yde, J. C.; Lamarche-Gagnon, G.; Hawkings, J. R.; Tedstone, A. J.; J. L. Wadham; J. E. Box, A. D. B.; Stibal, M. Carbon dating reveals a seasonal progression in the source of particulate organic carbon exported from the Greenland Ice Sheet. *Geophys. Res. Lett.* **2017**, *44*, 6209–6217 DOI: 10.1002/2017GL073219.
- (3) Bartholomew, I.; Nienow, P.; Sole, A.; Mair, D.; Cowton, T.; Palmer, S.; Wadham, J. Supraglacial forcing of subglacial drainage in the ablation zone of the Greenland ice sheet. *Geophys. Res. Lett.* **2011**, *38* (8), 1–5 DOI: 10.1029/2011GL047063.
- (4) Beaton, A. D.; Cardwell, C. L.; Thomas, R. S.; Sieben, V. J.; Legiret, F.-E.; Waugh, E. M.; Statham, P. J.; Mowlem, M. C.; Morgan, H. Lab-on-chip measurement of nitrate and nitrite for in situ analysis of natural waters. *Environ. Sci. Technol.* **2012**, *46* (17), 9548–9556 DOI: 10.1021/es300419u.
